# Supplementary material for: Evaluation of non-response to the In-Center Hemodialysis Consumer Assessment of Healthcare Providers and Systems (ICH CAHPS) survey
Source: PubMed Central journal article supplement (PMC6194668; doi:10.1186/s12913-018-3618-4), 2018-10-19
Supplement: 12913_2018_3618_MOESM1_ESM.pdf [file 12913_2018_3618_MOESM1_ESM.pdf]

Supplementary material

Supplementary Box 1: Key questions from the 2012 ICH CAHPS survey

| Question number | Question wording                                                                                                                                                                                    |
|-----------------|-----------------------------------------------------------------------------------------------------------------------------------------------------------------------------------------------------|
| 1               | Where do you get your dialysis treatments?                                                                                                                                                          |
| 2               | How long have you been getting dialysis at this dialysis center?                                                                                                                                    |
| 8               | Using any number from 0 to 10, where 0 is the worst kidney doctors possible and 10 is the best kidney doctors possible, what number would you use to rate the kidney doctors you have now?          |
| 20              | In the last 3 months, which one did they use most often to connect you to the dialysis machine?                                                                                                     |
| 23              | In the last 3 months, did any problems occur during your dialysis?                                                                                                                                  |
| 32              | Using any number from 0 to 10, where 0 is the worst dialysis center staff possible and 10 is the best dialysis center staff possible, what number would you use to rate your dialysis center staff? |
| 35              | Using any number from 0 to 10, where 0 is the worst dialysis center possible and 10 is the best dialysis center possible, what number would you use to rate your dialysis center?                   |
| 37              | Are you eligible for a kidney transplant?                                                                                                                                                           |
| 41              | In the last 12 months, were you ever unhappy with the care you received at the dialysis center or from your kidney doctors?                                                                         |
| 45              | In general, how would you rate your overall health?                                                                                                                                                 |
| 46              | In general, how would you rate your overall mental or emotional health?                                                                                                                             |
| 47              | Are you being treated for high blood pressure?                                                                                                                                                      |
| 48              | Are you being treated for diabetes or high blood sugar?                                                                                                                                             |
| 49              | Are you being treated for heart disease or heart problems?                                                                                                                                          |
| 50              | What is your age?                                                                                                                                                                                   |
| 51              | Are you male or female?                                                                                                                                                                             |
| 52              | What is the highest grade or level of school that you have completed?                                                                                                                               |
| 53              | Are you of Hispanic or Latino origin or descent?                                                                                                                                                    |
| 54              | What is your race? Please mark one or more.                                                                                                                                                         |
| 55              | What language do you mainly speak at home?                                                                                                                                                          |
| 56              | Did someone help you complete this survey?                                                                                                                                                          |

\*Responses to at least 12 of these questions were required for the survey to be deemed usable

Supplementary Figure 1a: Flow diagram for secondary analysis

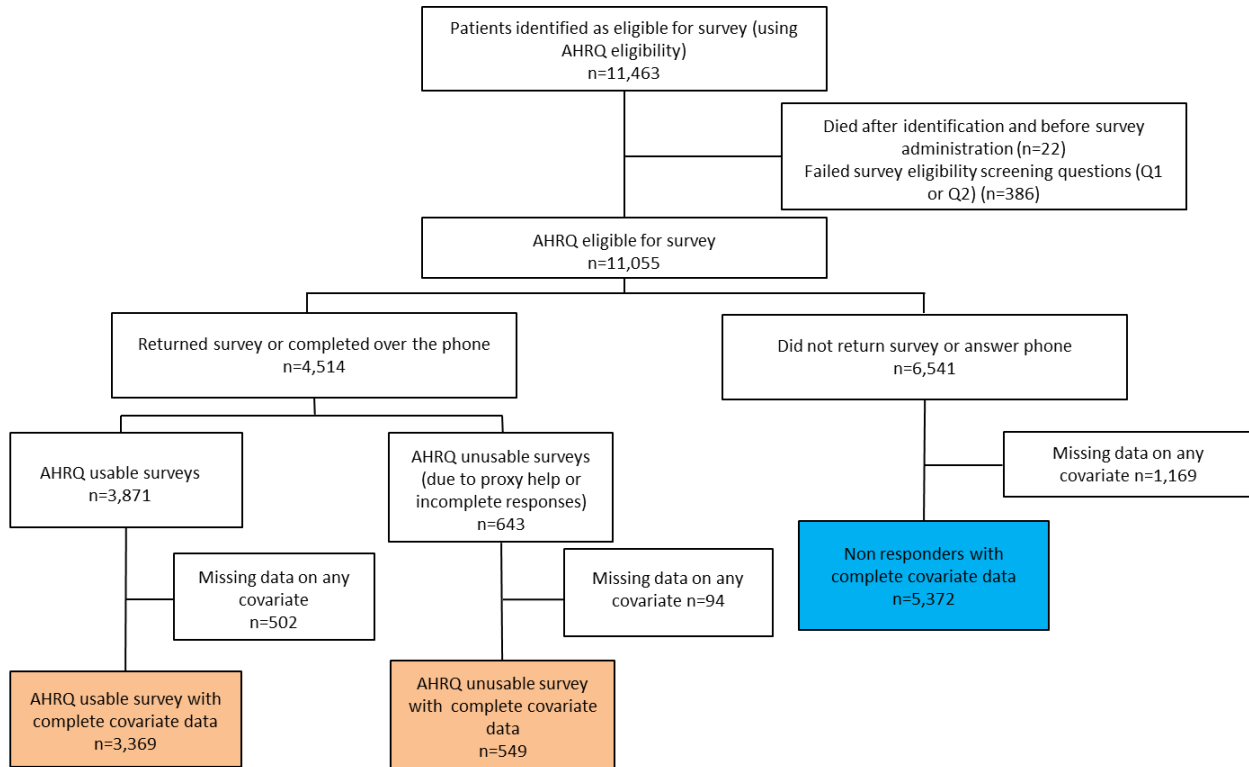

\*Patients in the orange boxes are combined (“Expanded usable”) and compared to patients in the blue box above

Supplementary Figure 1b: Flow diagram for first sensitivity analysis

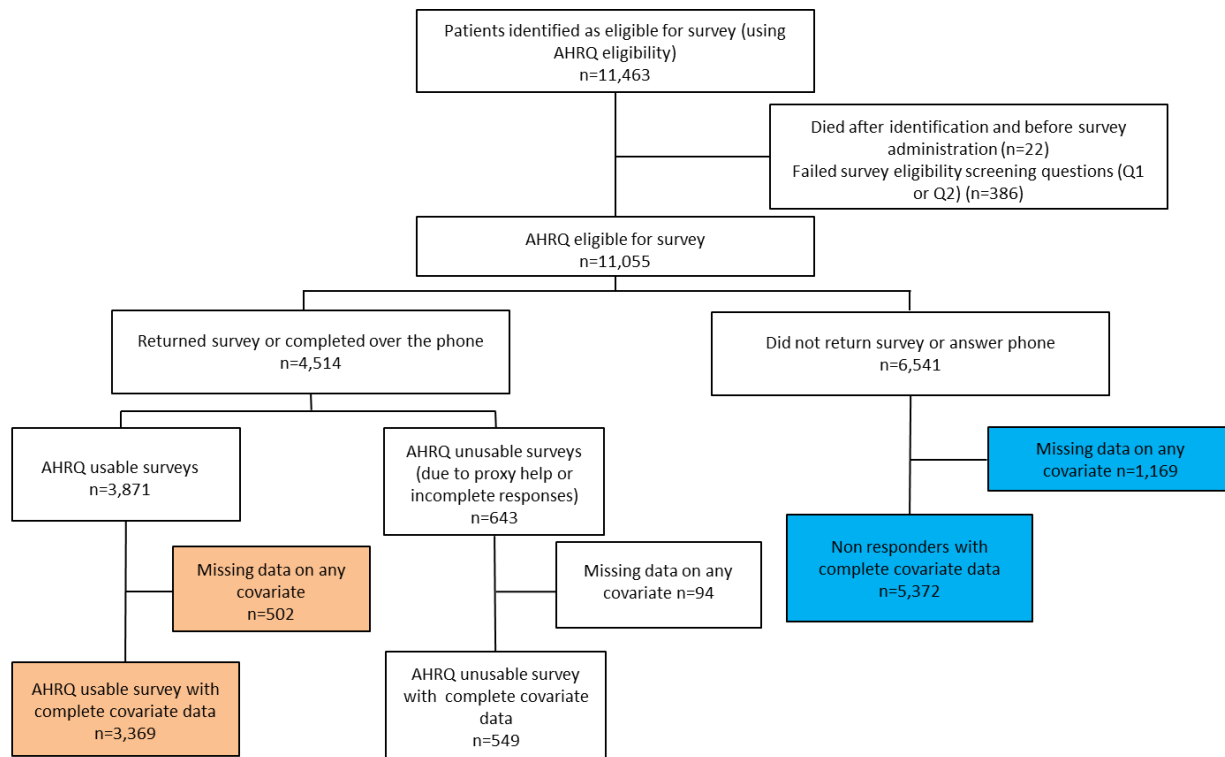

\*After multiple imputation for missing non-functional covariate data, patients from the orange boxes are compared to patients from the blue boxes above

Supplementary Figure 1c: Flow diagram for second sensitivity analysis

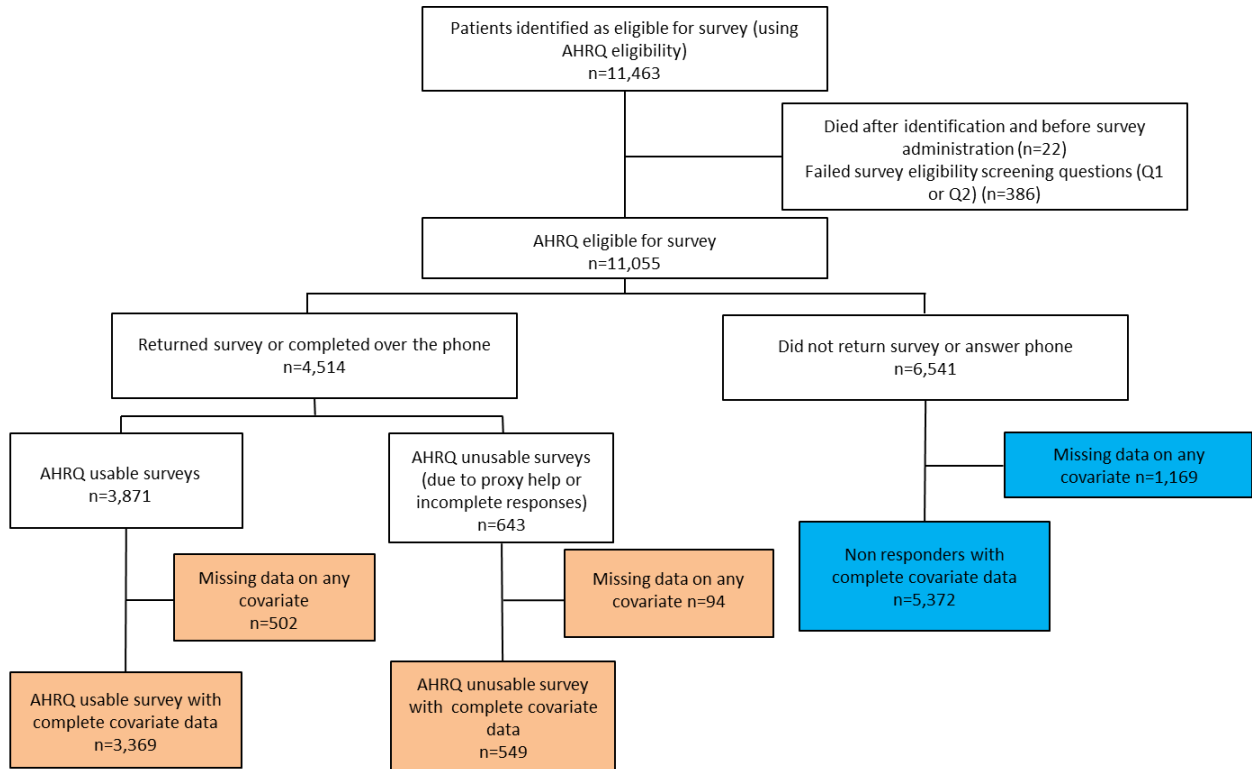

\*After multiple imputation for missing non-functional covariate data, patients from the orange boxes are compared to patients from the blue boxes above

Supplementary Figure 2: Responses gained using the expanded usable criteria

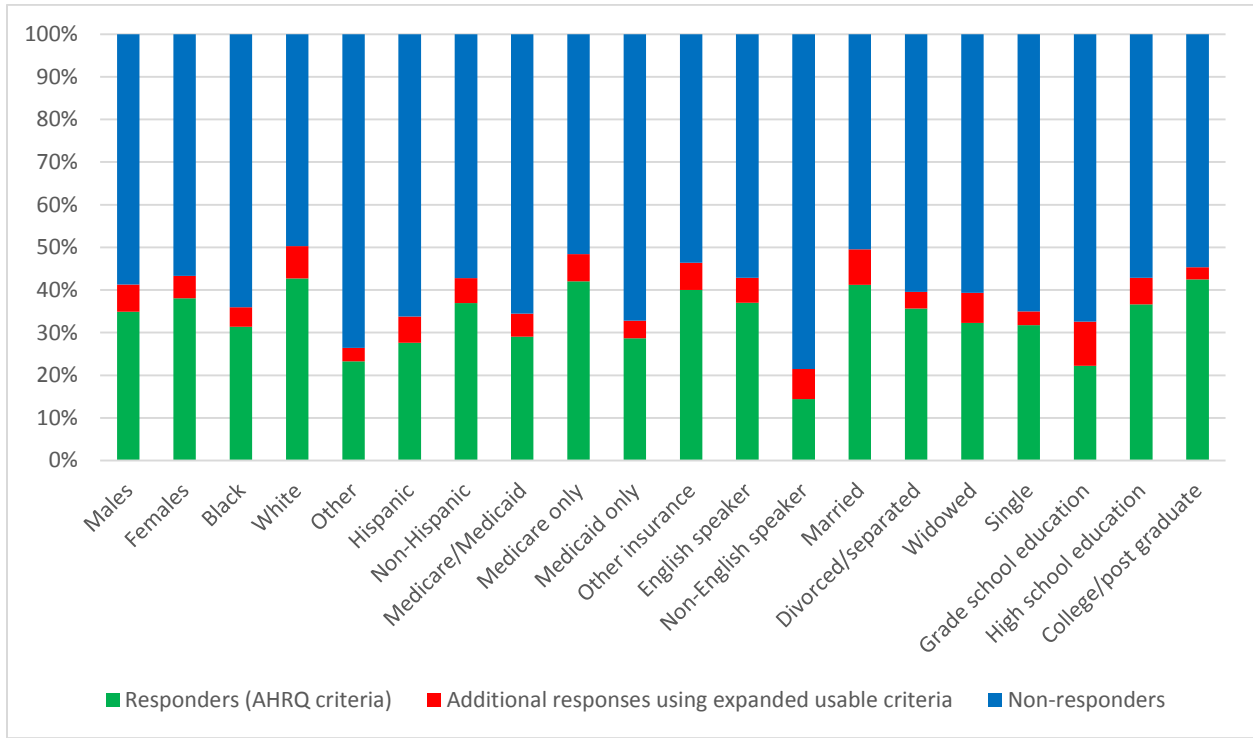

Supplementary Table 1: Multivariable logistic regression models predicting non-response using “expanded usable” criteria

|                                                   | Model 1                  | Model 2                  | Model 3                  |
|---------------------------------------------------|--------------------------|--------------------------|--------------------------|
| ICC                                               | 0.012                    | 0.013                    | 0.014                    |
| Age, per 5 years                                  | <b>0.95 (0.93, 0.97)</b> | <b>0.93 (0.91, 0.95)</b> | <b>0.89 (0.87, 0.91)</b> |
| Female sex                                        | <b>0.81 (0.74, 0.88)</b> | <b>0.79 (0.72, 0.88)</b> | <b>0.77 (0.70, 0.86)</b> |
| Race, white vs. black                             | <b>0.61 (0.55, 0.67)</b> | <b>0.62 (0.55, 0.68)</b> | <b>0.58 (0.52, 0.65)</b> |
| Race, other vs. black                             | <b>1.33 (1.08, 1.63)</b> | <b>1.37 (1.11, 1.69)</b> | <b>1.34 (1.08, 1.66)</b> |
| Ethnicity, Hispanic vs non-Hispanic               | 1.17 (0.95, 1.43)        | 1.17 (0.95, 1.45)        | 1.21 (0.98, 1.49)        |
| Insurance, Medicare/Medicaid vs. other            | <b>1.27 (1.12, 1.45)</b> | <b>1.20 (1.05, 1.37)</b> | 1.04 (0.91, 1.20)        |
| Insurance, Medicare only vs. other                | 0.97 (0.87, 1.10)        | 0.99 (0.88, 1.12)        | 0.99 (0.87, 1.12)        |
| Insurance, Medicaid only vs. other                | 1.16 (0.93, 1.45)        | 1.05 (0.84, 1.31)        | 0.89 (0.71, 1.13)        |
| Marital status, married vs. single                | <b>0.75 (0.66, 0.85)</b> | <b>0.77 (0.68, 0.88)</b> | <b>0.78 (0.69, 0.89)</b> |
| Marital status, divorced/separated vs. single     | 1.00 (0.88, 1.14)        | 0.98 (0.86, 1.12)        | 1.03 (0.90, 1.19)        |
| Marital status, widowed vs. single                | <b>1.31 (1.11, 1.54)</b> | <b>1.33 (1.12, 1.57)</b> | <b>1.34 (1.13, 1.59)</b> |
| Education level, grade school vs. college or more | <b>1.36 (1.16, 1.60)</b> | <b>1.33 (1.13, 1.57)</b> | <b>1.29 (1.10, 1.53)</b> |
| Education level, high school vs. college or more  | 1.00 (0.91, 1.11)        | 0.98 (0.88, 1.09)        | 0.99 (0.89, 1.10)        |
| English speaker                                   | <b>0.52 (0.38, 0.72)</b> | <b>0.48 (0.35, 0.66)</b> | <b>0.49 (0.35, 0.68)</b> |
| Hospitalizations                                  |                          | <b>1.49 (1.30, 1.71)</b> | <b>1.45 (1.26, 1.67)</b> |
| Active on transplant waitlist                     |                          | <b>0.82 (0.71, 0.95)</b> | 0.90 (0.77, 1.04)        |
| BMI, per 2 kg/m <sup>2</sup>                      |                          | <b>0.96 (0.95, 0.97)</b> | <b>0.96 (0.95, 0.97)</b> |
| Cause ESRD, diabetes vs. other                    |                          | <b>1.17 (1.05, 1.31)</b> | 1.07 (0.95, 1.20)        |
| Cause ESRD, hypertension vs. other                |                          | 1.07 (0.95, 1.21)        | 1.07 (0.95, 1.21)        |
| Vascular access, catheter vs. fistula             |                          | 1.34 (1.18, 1.53)        | <b>1.16 (1.02, 1.32)</b> |
| Vascular access, graft vs. fistula                |                          | 0.98 (0.88, 1.10)        | 0.96 (0.85, 1.08)        |
| Hemoglobin, per 0.5 g/dL                          |                          | 0.99 (0.97, 1.01)        | 0.99 (0.97, 1.01)        |
| Albumin, per 0.2 g/dL                             |                          | <b>0.92 (0.89, 0.94)</b> | <b>0.95 (0.93, 0.98)</b> |
| Kt/V, per 0.2                                     |                          | 0.98 (0.95, 1.02)        | 0.97 (0.94, 1.01)        |
| ESRD vintage, per 12 months                       |                          | 1.01 (1.00, 1.03)        | 1.01 (1.00, 1.03)        |
| ESRD vintage > 12 months before current facility  |                          | 0.97 (0.86, 1.10)        | 0.95 (0.84, 1.07)        |
| Unexcused absences                                |                          | <b>1.30 (1.15, 1.47)</b> | <b>1.35 (1.19, 1.53)</b> |
| Treatments shortened                              |                          | <b>1.33 (1.21, 1.45)</b> | <b>1.32 (1.20, 1.45)</b> |
| Ability to ambulate                               |                          |                          | <b>0.84 (0.71, 1.00)</b> |
| Ability to transfer                               |                          |                          | 1.16 (0.95, 1.41)        |
| Falls                                             |                          |                          | 0.88 (0.76, 1.03)        |
| Nursing home resident                             |                          |                          | <b>2.11 (1.68, 2.64)</b> |
| ADL score, per 1 increase                         |                          |                          | <b>0.88 (0.86, 0.91)</b> |

Data shown as odds ratio (OR) (95% CI). OR above 1.00 is associated with non-response. Associations with p<0.05 are in bold. BMI: Body mass index; ESRD: End stage renal disease; ADL: Activities of daily living

Supplementary Table 2: Proportion of missing data for each covariate

|                            | Eligible<br>(N=11055) |
|----------------------------|-----------------------|
| Race                       | 149 (1.4%)            |
| Ethnicity                  | 194 (1.8%)            |
| ESRD cause                 | 14 (0.1%)             |
| Insurance                  | 287 (2.6%)            |
| Vascular access            | 16 (0.1%)             |
| English speaker            | 597 (5.4%)            |
| Nursing Home Residence     | 631 (5.7%)            |
| Ability to ambulate        | 597 (5.4%)            |
| Ability to transfer        | 597 (5.4%)            |
| Falls                      | 597 (5.4%)            |
| Marital status             | 478 (4.3%)            |
| Education Level            | 478 (4.3%)            |
| Transplant waitlist status | 529 (4.8%)            |
| Albumin                    | 23 (0.2%)             |
| Hemoglobin                 | 19 (0.2%)             |
| Kt/V                       | 74 (0.7%)             |
| ADL score                  | 597 (5.4%)            |
| BMI                        | 148 (1.3%)            |

Data shown as n (%). BMI: Body mass index; ESRD: End stage renal disease; ADL: Activities of daily living

Supplementary Table 3: Baseline characteristics of participants with complete vs missing data

|                                                  | Eligible<br>(N=11055) | Any missing data<br>(n=1765, 16%) | Complete data<br>(n=9290, 84%) | <i>p</i> |
|--------------------------------------------------|-----------------------|-----------------------------------|--------------------------------|----------|
| Age                                              | 61.0 ± 14.8           | 60.4 ± 14.7                       | 61.1 ± 14.8                    | 0.04     |
| Female sex                                       | 4893 (44.3%)          | 825 (46.7%)                       | 4068 (43.8%)                   | 0.02     |
| Race                                             |                       |                                   |                                |          |
| Black                                            | 5054 (46.3%)          | 928 (57.4%)                       | 4126 (44.4%)                   | <0.001   |
| White                                            | 5071 (46.5%)          | 585 (36.2%)                       | 4486 (48.3%)                   |          |
| Other                                            | 781 (7.2%)            | 103 (6.4%)                        | 678 (7.3%)                     |          |
| Hispanic Ethnicity                               | 748 (6.9%)            | 111 (7.1%)                        | 637 (6.9%)                     | 0.76     |
| Cause of ESRD                                    |                       |                                   |                                |          |
| Diabetes                                         | 4719 (42.7%)          | 704 (40.2%)                       | 4015 (43.2%)                   | <0.001   |
| Hypertension                                     | 3223 (29.2%)          | 593 (33.9%)                       | 2630 (28.3%)                   |          |
| Other                                            | 3099 (28.1%)          | 454 (25.9%)                       | 2645 (28.5%)                   |          |
| Marital status                                   |                       |                                   |                                |          |
| Married                                          | 3988 (37.7%)          | 433 (33.6%)                       | 3555 (38.3%)                   | 0.002    |
| Divorced/Separated                               | 2209 (20.9%)          | 262 (20.4%)                       | 1947 (21.0%)                   |          |
| Widowed                                          | 1693 (16.0%)          | 217 (16.9%)                       | 1476 (15.9%)                   |          |
| Single                                           | 2687 (25.4%)          | 375 (29.1%)                       | 2312 (24.9%)                   |          |
| Education Level                                  |                       |                                   |                                |          |
| Grade School                                     | 1397 (13.2%)          | 176 (13.7%)                       | 1221 (13.1%)                   | 0.86     |
| High School                                      | 6463 (61.1%)          | 784 (60.9%)                       | 5679 (61.1%)                   |          |
| College/Post Graduate                            | 2717 (25.7%)          | 327 (25.4%)                       | 2390 (25.7%)                   |          |
| English speaker                                  | 10130 (96.9%)         | 1138 (97.4%)                      | 8992 (96.8%)                   | 0.24     |
| Nursing home resident                            | 769 (7.4%)            | 87 (7.7%)                         | 682 (7.3%)                     | 0.69     |
| Insurance                                        |                       |                                   |                                |          |
| Medicare/Medicaid                                | 3812 (35.4%)          | 509 (34.4%)                       | 3303 (35.6%)                   | 0.03     |
| Medicare only                                    | 4272 (39.7%)          | 626 (42.4%)                       | 3646 (39.3%)                   |          |
| Medicaid only                                    | 627 (5.8%)            | 94 (6.4%)                         | 533 (5.7%)                     |          |
| Other                                            | 2057 (19.1%)          | 249 (16.9%)                       | 1808 (19.5%)                   |          |
| Active on transplant waitlist                    | 1199 (11.4%)          | 151 (12.2%)                       | 1048 (11.3%)                   | 0.33     |
| Vascular access                                  |                       |                                   |                                |          |
| Fistula                                          | 6773 (61.4%)          | 1008 (57.6%)                      | 5765 (62.1%)                   | <0.001   |
| Catheter                                         | 1922 (17.4%)          | 371 (21.2%)                       | 1551 (16.7%)                   |          |
| Graft                                            | 2344 (21.2%)          | 370 (21.2%)                       | 1974 (21.3%)                   |          |
| Albumin (g/dL)                                   | 3.8 ± 0.4             | 3.8 ± 0.5                         | 3.8 ± 0.4                      | <0.001   |
| Hemoglobin (g/dL)                                | 11.1 ± 1.2            | 11.1 ± 1.3                        | 11.1 ± 1.2                     | 0.03     |
| Kt/V                                             | 1.61 ± 0.28           | 1.57 ± 0.28                       | 1.62 ± 0.28                    | <0.001   |
| BMI (kg/m <sup>2</sup> )                         | 28.4 ± 7.6            | 28.5 ± 7.6                        | 28.4 ± 7.6                     | 0.65     |
| Unexcused absences                               | 1964 (17.8%)          | 326 (18.5%)                       | 1638 (17.6%)                   | 0.40     |
| Treatments shortened                             | 5485 (49.6%)          | 853 (48.3%)                       | 4632 (49.9%)                   | 0.24     |
| Hospitalizations                                 | 1541 (13.9%)          | 238 (13.5%)                       | 1303 (14.0%)                   | 0.55     |
| ESRD vintage (months)                            | 39.4 (18.8, 75.3)     | 34.3 (14.9, 69.4)                 | 40.4 (19.5, 76.4)              | <0.001   |
| ESRD vintage > 12 months before current facility | 2413 (21.8%)          | 356 (20.2%)                       | 2057 (22.1%)                   | 0.07     |



|                     |              |             |              |      |
|---------------------|--------------|-------------|--------------|------|
| Ability to ambulate | 7970 (76.2%) | 865 (74.1%) | 7105 (76.5%) | 0.07 |
| Ability to transfer | 8769 (83.9%) | 949 (81.3%) | 7820 (84.2%) | 0.01 |
| Falls               | 1017 (9.7%)  | 123 (10.5%) | 894 (9.6%)   | 0.32 |
| ADL score           | 5.7 ± 2.6    | 5.7 ± 2.6   | 5.7 ± 2.6    | 0.96 |

Data shown as mean ± SD or median (25<sup>th</sup>, 75<sup>th</sup> percentiles) or n (%). p-value using Chi-squared statistic for categorical variables t-test for all continuous variables except ESRD vintage which is based on the non-parametric Wilcoxon test. BMI: Body mass index; ESRD: End stage renal disease; ADL: Activities of daily living

Supplementary table 4: Multivariable logistic regression models predicting non-response using multiple imputation using AHRQ method

|                                                   | Model 1                  | Model 2                  |
|---------------------------------------------------|--------------------------|--------------------------|
| Age, per 5 years                                  | 0.99 (0.97, 1.00)        | <b>0.96 (0.94, 0.98)</b> |
| Female sex                                        | <b>0.77 (0.71, 0.84)</b> | <b>0.72 (0.65, 0.79)</b> |
| Race, white vs. black                             | <b>0.63 (0.58, 0.70)</b> | <b>0.64 (0.58, 0.71)</b> |
| Race, other vs. black                             | 1.16 (0.96, 1.42)        | 1.18 (0.97, 1.44)        |
| Ethnicity, Hispanic vs non-Hispanic               | 1.17 (0.95, 1.44)        | 1.18 (0.95, 1.46)        |
| Insurance, Medicare/Medicaid vs. other            | <b>1.37 (1.21, 1.55)</b> | <b>1.28 (1.12, 1.45)</b> |
| Insurance, Medicare only vs. other                | 0.96 (0.86, 1.07)        | 0.96 (0.86, 1.08)        |
| Insurance, Medicaid only vs. other                | <b>1.32 (1.07, 1.63)</b> | 1.20 (0.96, 1.49)        |
| Marital status, married vs. single                | <b>0.83 (0.73, 0.93)</b> | <b>0.86 (0.76, 0.97)</b> |
| Marital status, divorced/separated vs. single     | 0.95 (0.84, 1.08)        | 0.94 (0.82, 1.07)        |
| Marital status, widowed vs. single                | <b>1.24 (1.05, 1.45)</b> | <b>1.25 (1.06, 1.47)</b> |
| Education level, grade school vs. college or more | <b>2.08 (1.76, 2.46)</b> | <b>2.04 (1.72, 2.42)</b> |
| Education level, high school vs. college or more  | <b>1.22 (1.11, 1.35)</b> | <b>1.19 (1.08, 1.32)</b> |
| English speaker                                   | <b>0.53 (0.40, 0.70)</b> | <b>0.51 (0.38, 0.67)</b> |
| Hospitalizations                                  |                          | <b>1.46 (1.28, 1.67)</b> |
| Active on transplant waitlist                     |                          | <b>0.82 (0.72, 0.94)</b> |
| BMI, per 2 kg/m <sup>2</sup>                      |                          | <b>0.96 (0.95, 0.97)</b> |
| Cause ESRD, diabetes vs. other                    |                          | <b>1.32 (1.19, 1.47)</b> |
| Cause ESRD, hypertension vs. other                |                          | <b>1.13 (1.01, 1.27)</b> |
| Vascular access, catheter vs. fistula             |                          | <b>1.33 (1.18, 1.50)</b> |
| Vascular access, graft vs. fistula                |                          | 1.02 (0.92, 1.14)        |
| Hemoglobin, per 0.5 g/dL                          |                          | 0.99 (0.97, 1.01)        |
| Albumin, per 0.2 g/dL                             |                          | <b>0.89 (0.87, 0.91)</b> |
| Kt/V, per 0.2                                     |                          | 1.02 (0.97, 1.08)        |
| ESRD vintage, per 12 months                       |                          | <b>1.02 (1.00, 1.04)</b> |
| ESRD vintage > 12 months before current facility  |                          | 0.96 (0.86, 1.08)        |
| Unexcused absences                                |                          | <b>1.26 (1.12, 1.41)</b> |
| Treatments shortened                              |                          | <b>1.24 (1.13, 1.35)</b> |

Data shown as odds ratio (OR) (95% CI). OR above 1.00 is associated with non-response. Associations with p<0.05 are in bold. Only 2 models are show since we did not impute functional covariate data. BMI: Body mass index; ESRD: End stage renal disease; ADL: Activities of daily living

Supplementary table 5: Multivariable logistic regression models predicting non-response using multiple imputation using “expanded usable criteria”

|                                                   | Model 1                  | Model 2                  |
|---------------------------------------------------|--------------------------|--------------------------|
| Age, per 5 years                                  | <b>0.95 (0.94, 0.97)</b> | <b>0.93 (0.91, 0.95)</b> |
| Female sex                                        | <b>0.82 (0.76, 0.89)</b> | <b>0.78 (0.71, 0.86)</b> |
| Race, white vs. black                             | <b>0.61 (0.56, 0.67)</b> | <b>0.61 (0.56, 0.68)</b> |
| Race, other vs. black                             | <b>1.26 (1.04, 1.53)</b> | <b>1.30 (1.06, 1.59)</b> |
| Ethnicity, Hispanic vs non-Hispanic               | 1.18 (0.98, 1.42)        | 1.20 (1.00, 1.45)        |
| Insurance, Medicare/Medicaid vs. other            | <b>1.29 (1.15, 1.46)</b> | <b>1.23 (1.08, 1.39)</b> |
| Insurance, Medicare only vs. other                | 0.96 (0.86, 1.08)        | 0.98 (0.87, 1.10)        |
| Insurance, Medicaid only vs. other                | <b>1.26 (1.03, 1.55)</b> | 1.15 (0.93, 1.42)        |
| Marital status, married vs. single                | <b>0.76 (0.67, 0.85)</b> | <b>0.78 (0.69, 0.88)</b> |
| Marital status, divorced/separated vs. single     | 1.00 (0.88, 1.14)        | 0.99 (0.87, 1.13)        |
| Marital status, widowed vs. single                | <b>1.22 (1.05, 1.43)</b> | <b>1.24 (1.06, 1.45)</b> |
| Education level, grade school vs. college or more | <b>1.40 (1.21, 1.63)</b> | <b>1.37 (1.17, 1.60)</b> |
| Education level, high school vs. college or more  | 1.04 (0.95, 1.14)        | 1.01 (0.92, 1.12)        |
| English speaker                                   | <b>0.51 (0.40, 0.65)</b> | <b>0.49 (0.38, 0.62)</b> |
| Hospitalizations                                  |                          | <b>1.54 (1.35, 1.75)</b> |
| Active on transplant waitlist                     |                          | <b>0.82 (0.71, 0.94)</b> |
| BMI, per 2 kg/m <sup>2</sup>                      |                          | <b>0.96 (0.95, 0.97)</b> |
| Cause ESRD, diabetes vs. other                    |                          | <b>1.19 (1.07, 1.32)</b> |
| Cause ESRD, hypertension vs. other                |                          | 1.11 (0.99, 1.24)        |
| Vascular access, catheter vs. fistula             |                          | <b>1.41 (1.25, 1.59)</b> |
| Vascular access, graft vs. fistula                |                          | 0.98 (0.88, 1.09)        |
| Hemoglobin, per 0.5 g/dL                          |                          | 0.98 (0.95, 1.01)        |
| Albumin, per 0.2 g/dL                             |                          | <b>0.92 (0.88, 0.96)</b> |
| Kt/V, per 0.2                                     |                          | 1.02 (0.96, 1.08)        |
| ESRD vintage, per 12 months                       |                          | 1.01 (0.99, 1.03)        |
| ESRD vintage > 12 months before current facility  |                          | 0.98 (0.88, 1.10)        |
| Unexcused absences                                |                          | <b>1.34 (1.19, 1.50)</b> |
| Treatments shortened                              |                          | <b>1.27 (1.17, 1.38)</b> |

Data shown as odds ratio (OR) (95% CI). OR above 1.00 is associated with non-response. Associations with p<0.05 are in bold. BMI: Body mass index; ESRD: End stage renal disease; ADL: Activities of daily living

Supplementary Figure 3a: Ranking of variable contribution for determining non-response using AHRQ method and full model (Model 3)

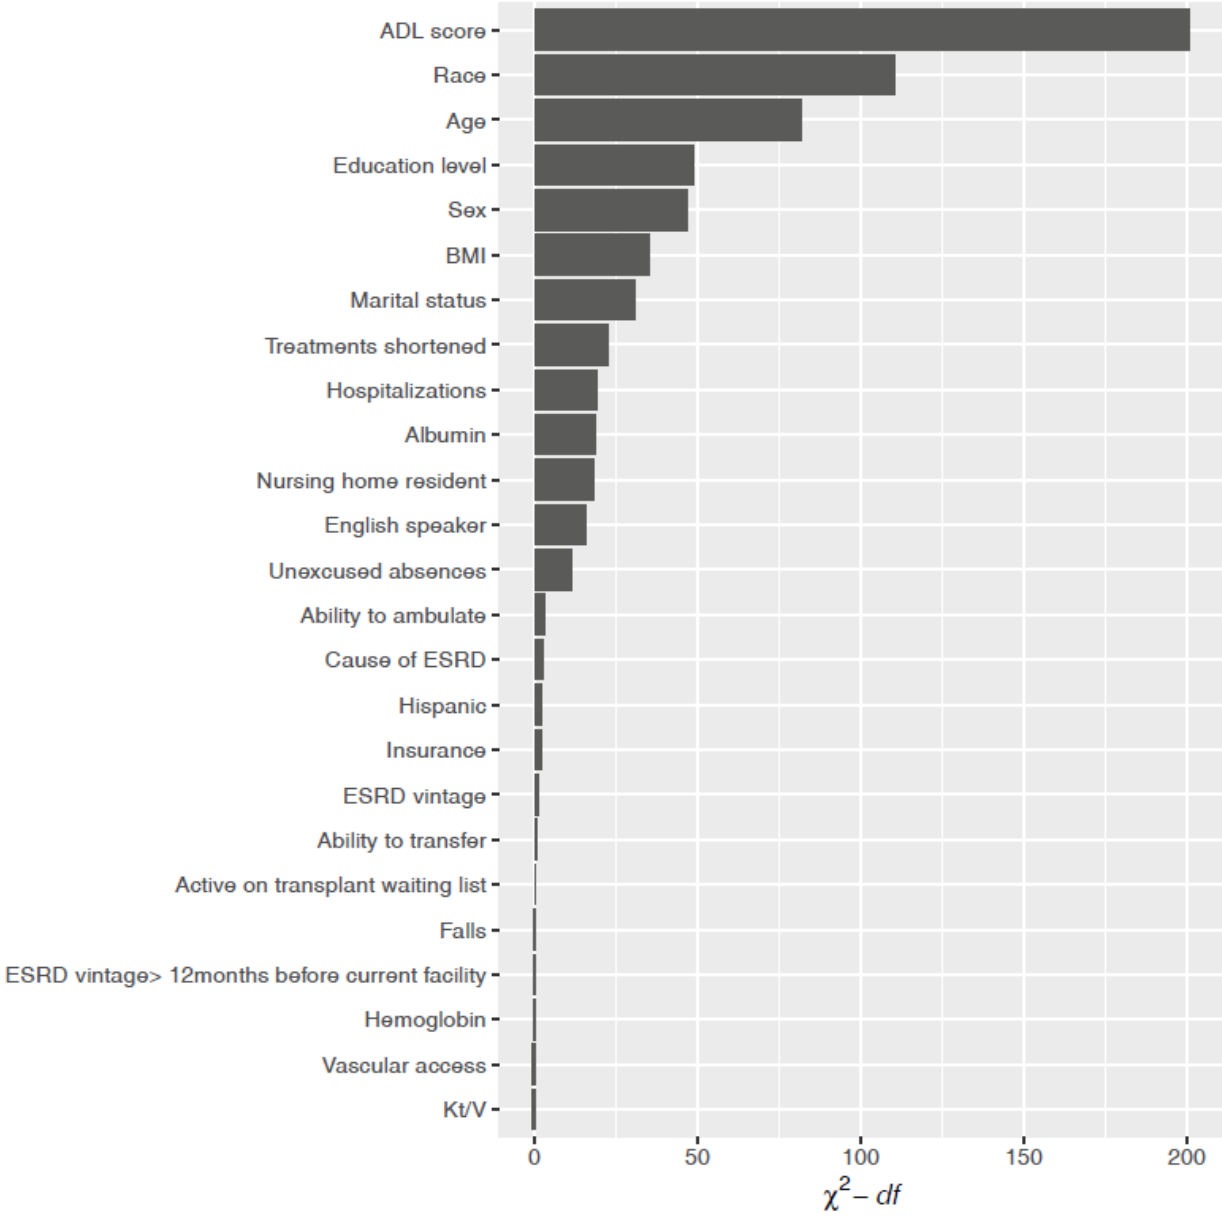

ESRD: End stage renal disease; ADL: Activities of daily living; BMI: Body mass index

Supplementary Figure 3b: Ranking of variable contribution for determining non-response using “expanded usable” criteria and model 2 (without functional covariates)

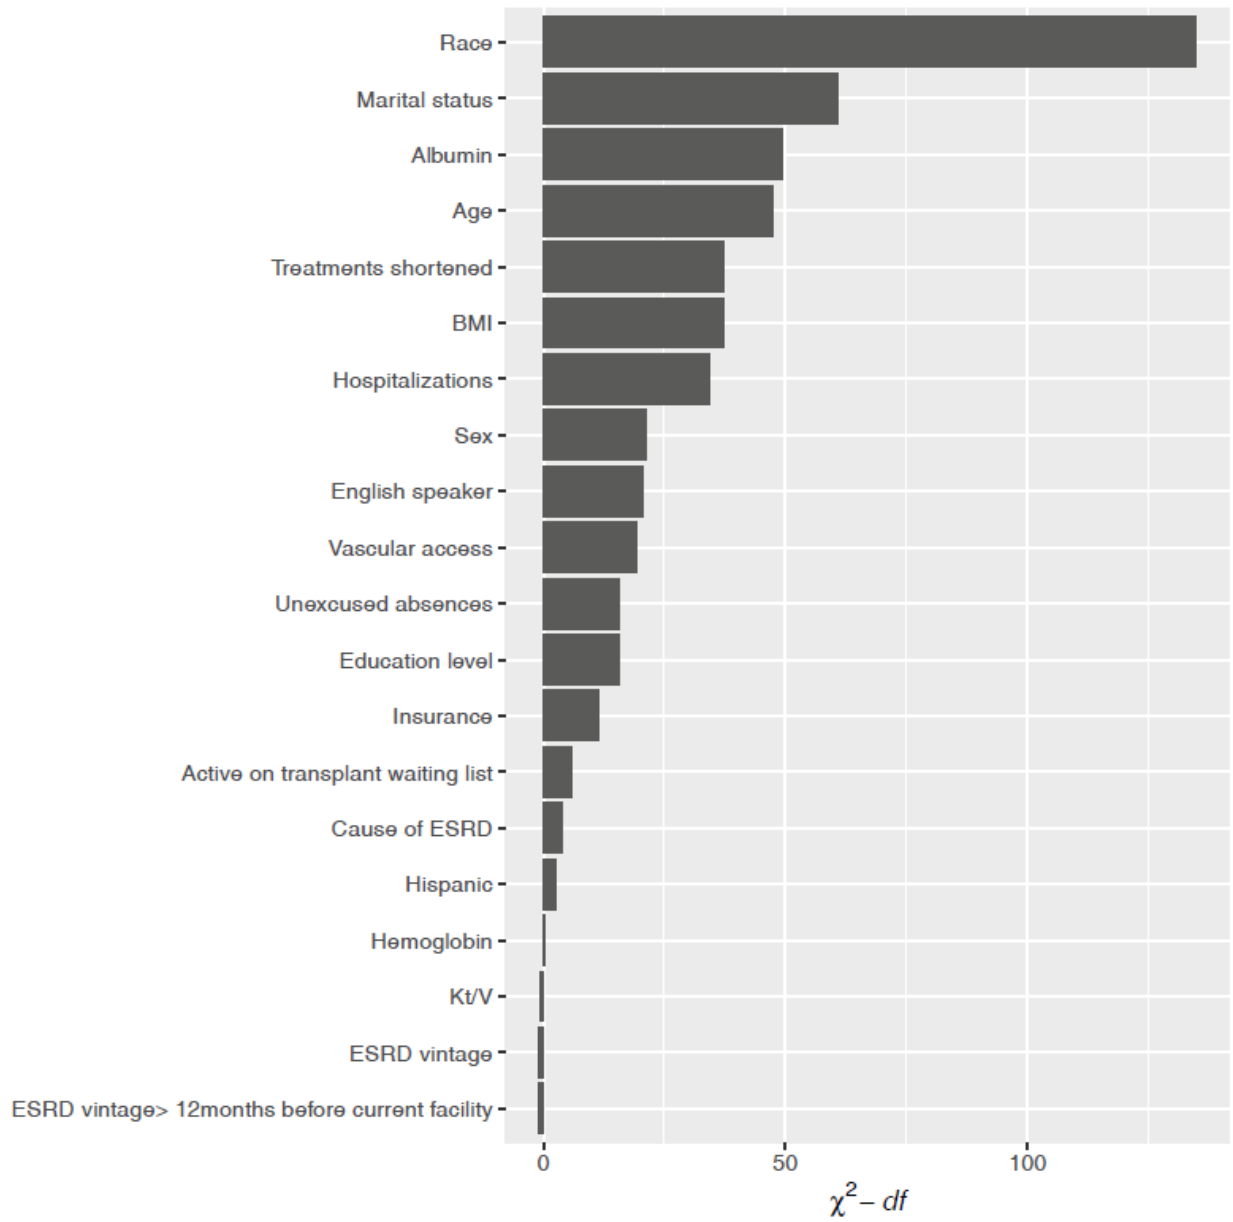

ESRD: End stage renal disease; BMI: Body mass index

Supplementary Figure 3c: Ranking of variable contribution for determining non-response using “expanded usable” criteria and full model (Model 3)

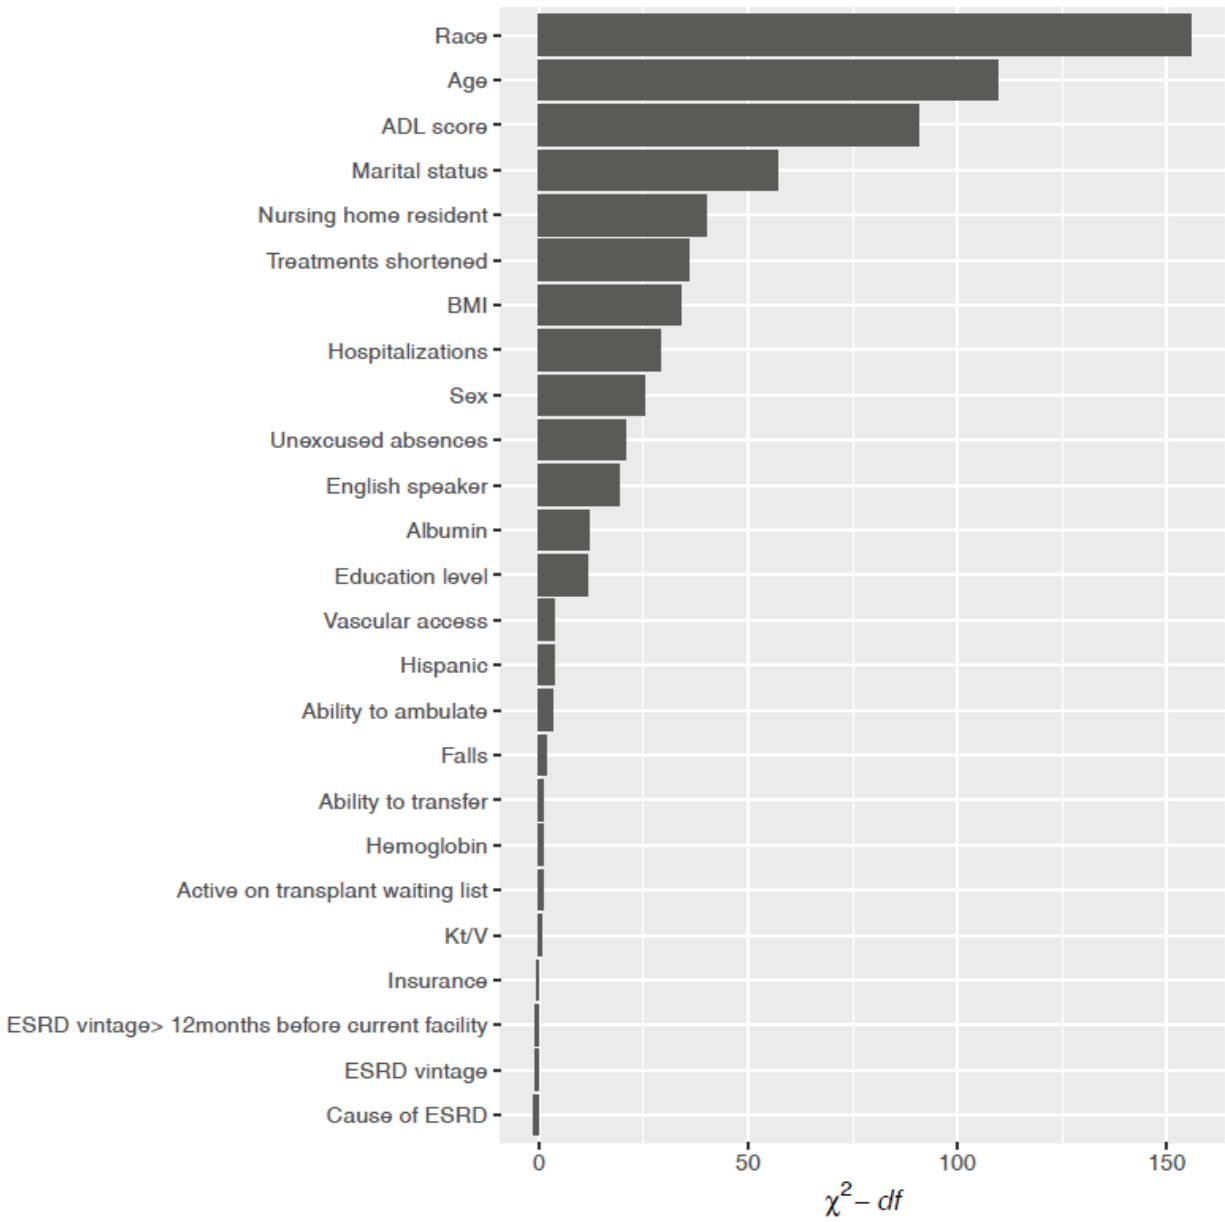

ESRD: End stage renal disease; ADL: Activities of daily living; BMI: Body mass index
